# Supplementary material for: Co-Delivery of Dihydroartemisinin and Indocyanine Green by Metal-Organic Framework-Based Vehicles for Combination Treatment of Hepatic Carcinoma
Source: MDPI journal article supplement (doi:10.3390/pharmaceutics14102047), 2022-09-26
Supplement: s1 [file s1]

## Supplementary Information

### Co-delivery of dihydroartemisinin and indocyanine green by metal-organic framework-based vehicles for combination treatment of hepatic carcinoma

Yang Chen <sup>1,†</sup>, Bin Wang <sup>3,†</sup>, Wenping Chen <sup>3</sup>, Tao Wang <sup>4</sup>, Min Li <sup>3</sup>, Zucheng Shen <sup>3</sup>, Fang Wang <sup>3</sup>, Jing Jia <sup>3</sup>, Fenglan Li <sup>3</sup>, Xiangyu Huang <sup>3</sup>, Junyang Zhuang <sup>3,\*</sup> and Ning Li <sup>3,\*</sup>

<sup>1</sup> Department of Hepatobiliary Surgery, Fuzhou Second Hospital, Fuzhou 350007, China.

<sup>2</sup> The Third Clinical Medical College, Fujian Medical University, Fuzhou 350007, China.

<sup>3</sup> Fujian Key Laboratory of Drug Target Discovery and Structural and Functional Research, School of Pharmacy, Fujian Medical University, Fuzhou 350122, China.

<sup>4</sup> Department of Oral and Maxillofacial Surgery, School and Hospital of Stomatology, Fujian Medical University, , Fuzhou 350002, China.

\* Corresponding author. E-mail: Junyang.Zhuang@hotmail.com (J. Z.); fjtlny@126.com or ningli@fjmu.edu.cn (N. L.)

† These authors contributed equally to this work.

## **Table of Contents**

Figure S1. Dynamic light scattering results of Nile Red&DHA@ZIF-8.

Figure S2. Zeta potential of ZIF-8, ICG@ZIF-8, ICG&DHA@ZIF-8, and Nile Red&DHA@ZIF-8.

Figure S3. N<sub>2</sub> adsorption isotherms and Horvath–Kawazoe (HK) pore size distribution of ZIF-8 and ICG&DHA@ZIF-8.

Figure S4. Cumulative ICG release from ICG&DHA@ZIF-8 in PBS at pH 7.4 and pH 5.4.

Figure S5. Relative cell viability of HepG2 cells after incubation with free DHA and ICG&DHA@ZIF-8 (L-).

Figure S6. Relative cell viability of HepG2 cells after incubation with ZIF-8.

Figure S7. Fluorescent quantitative analysis of the ROS level.

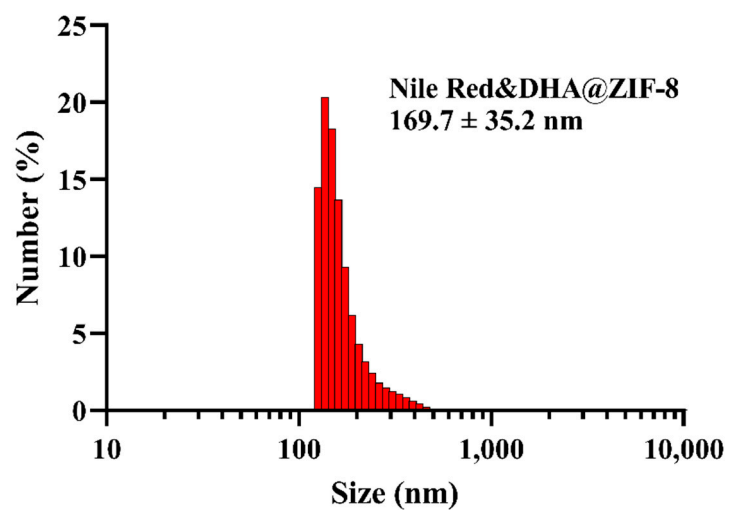

Figure S1. Dynamic light scattering results of Nile Red&DHA@ZIF-8.

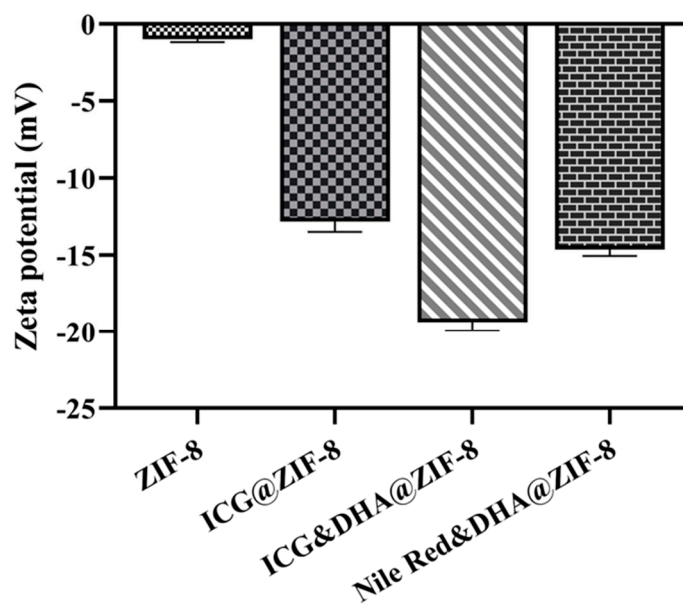

Figure S2. Zeta potential of ZIF-8, ICG@ZIF-8, ICG&DHA@ZIF-8, and Nile Red&DHA@ZIF-8.

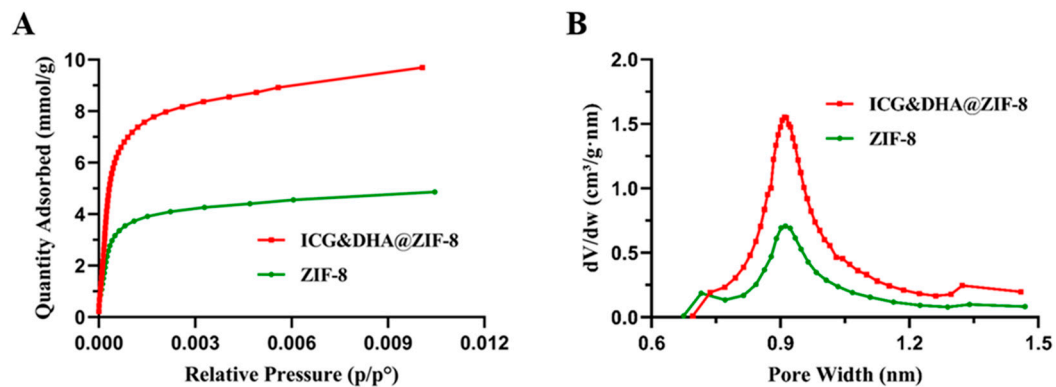

Figure S3. N<sub>2</sub> adsorption isotherms (A) and Horvath–Kawazoe (HK) pore size distribution (B) of ZIF-8 and ICG&DHA@ZIF-8.

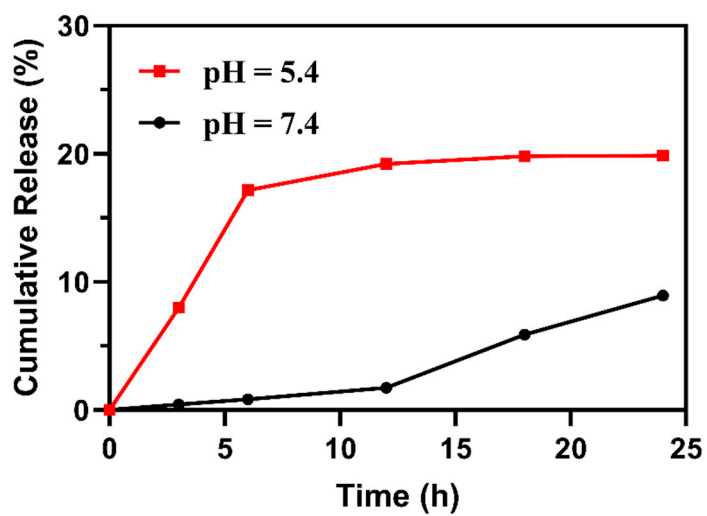

Figure S4. Cumulative ICG release from ICG&DHA@ZIF-8 in PBS at pH 7.4 and pH 5.4.

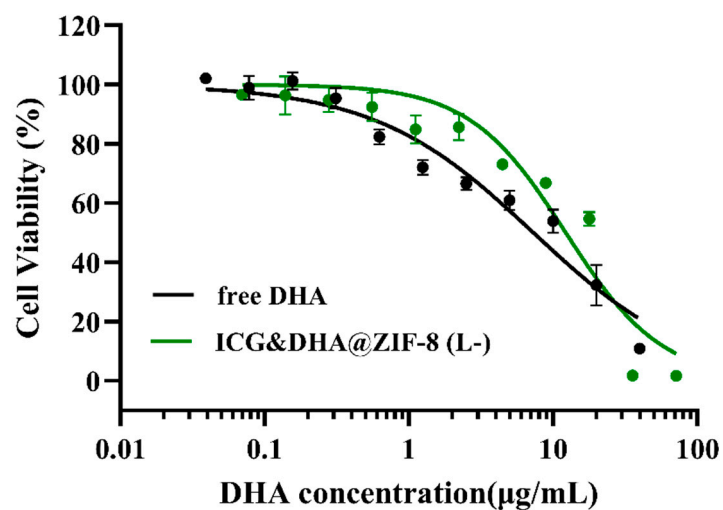

Figure S5. Relative cell viability of HepG2 cells after incubation with free DHA and ICG&DHA@ZIF-8 (L-) (“ICG&DHA@ZIF-8 (L-)” means ICG&DHA@ZIF-8 without laser irradiation).

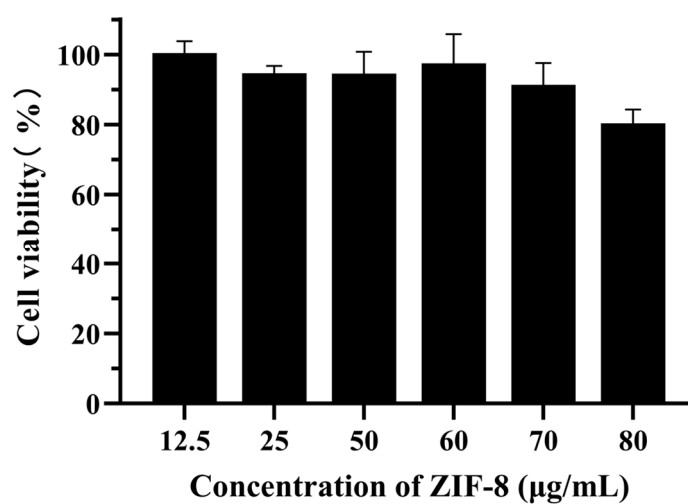

Figure S6. Relative cell viability of HepG2 cells after incubation with ZIF-8.

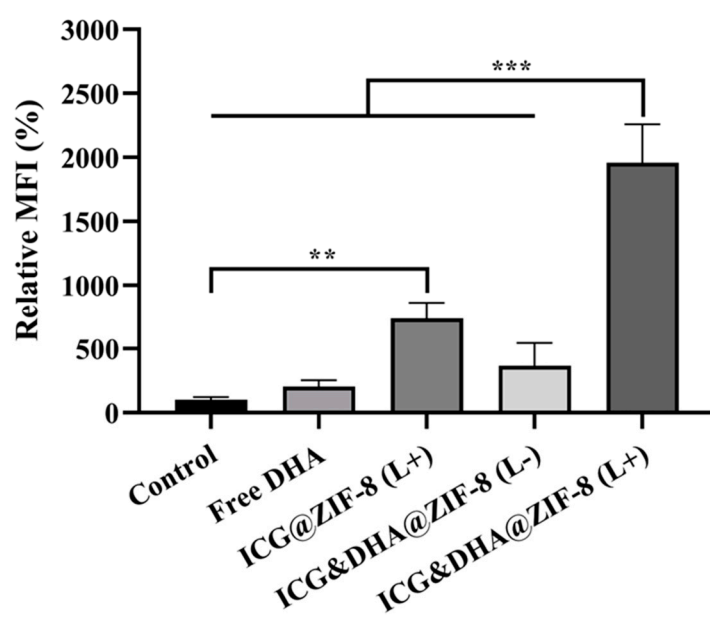

Figure S7. Fluorescent quantitative analysis of the ROS level ( $n = 3$ ).  $*p < 0.05$ ,  $**p < 0.01$ ,  $***p < 0.001$ .
